# Supplementary material for: The Non-Equilibrium Thermodynamics and Kinetics of Focal Adhesion Dynamics
Source: PLoS One. 2010 Aug 18;5(8):e12043. doi: 10.1371/journal.pone.0012043 (PMC2923603; doi:10.1371/journal.pone.0012043)
Supplement: File S1 — (0.02 MB PDF) [file pone.0012043.s001.pdf]

## Supporting information

**Reaction-limited formulation:** The FA is in green. Only edge motion is shown for purposes of visualization; the changing concentration profile over the FA is not shown.

**Movie S1:**  $P = 0$  pN and small conformational change; no growth.

**Movie S2:**  $P = 1 \times 10^{-1}$  pN and small conformational change; treadmilling with growth.

**Movie S3:**  $P = 1 \times 10^2$  pN and small conformational change; pure treadmilling.

**Movie S4:**  $P = 10^4$  pN and small conformational change; treadmilling with resorption.

**Movie S5:**  $P = 0$  pN and large conformational change; no growth.

**Movie S6:**  $P = 1 \times 10^{-1}$  pN and large conformational change; treadmilling dominated by growth at both ends.

**Movie S7:**  $P = 1 \times 10^2$  pN and large conformational change; symmetric growth.

**Movie S8:**  $P = 10^4$  pN and large conformational change; treadmilling with resorption.

**Reaction-diffusion formulation:** The changing concentration profile over the FA is shown in green.

**Movie S9:** Reaction-diffusion formulation with  $P = 10^2$  pN and small conformational change; pure treadmilling is discernible.

**Movie S10:** Reaction-diffusion formulation with  $P = 10^2$  pN and large conformational change; treadmilling is dominated by growth at both ends.
